# Supplementary material for: Bortezomib-loaded immunoliposomes against CD44 expressing macrophages: an interplay for inflammation resolution
Source: Royal Society of Chemistry journal article supplement (doi:10.1039/d4nr00137k), 2024-01-01

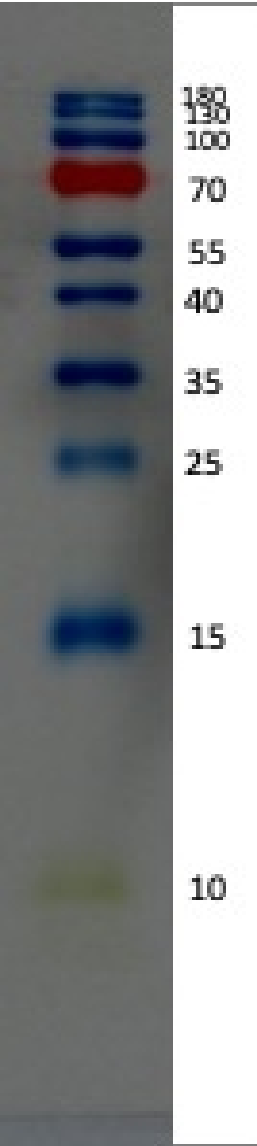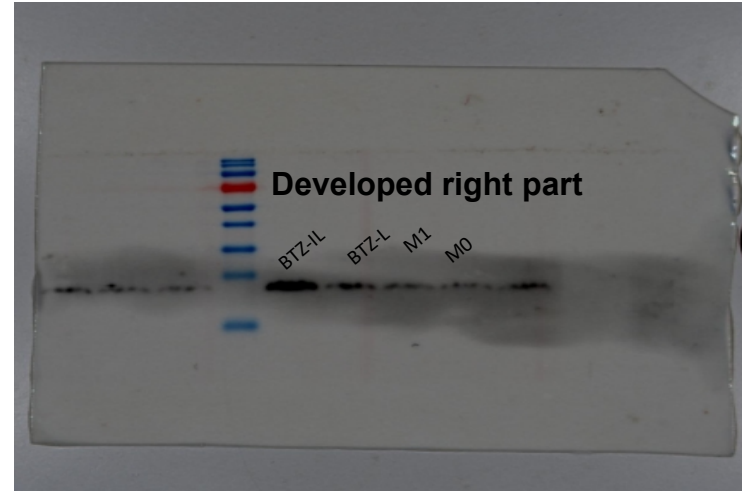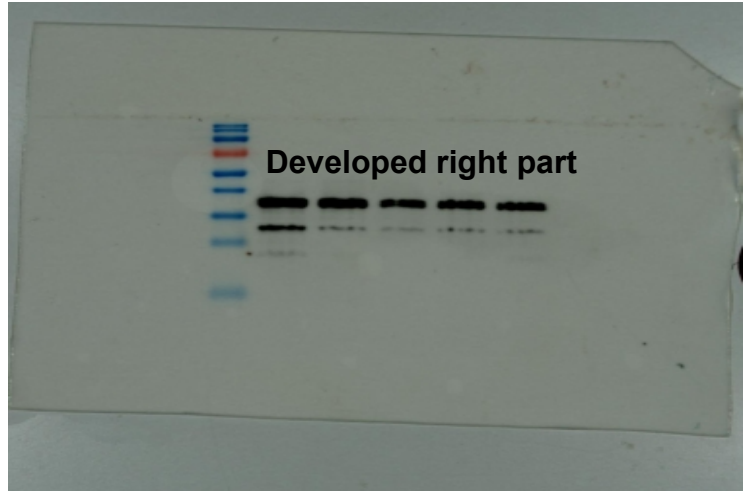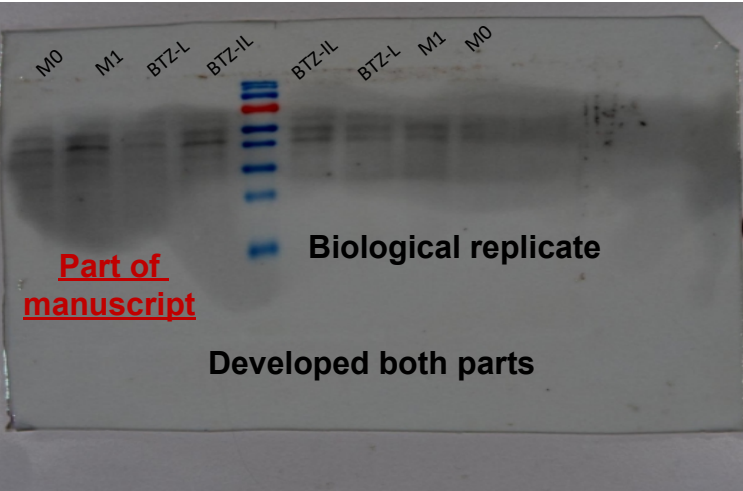

**Blot:2 GAPDH 37 kDa (after stripping)**

**Blot:3 BCL2 26 kDa Biological replicate**

**Blot:3 GAPDH 37 kDa**

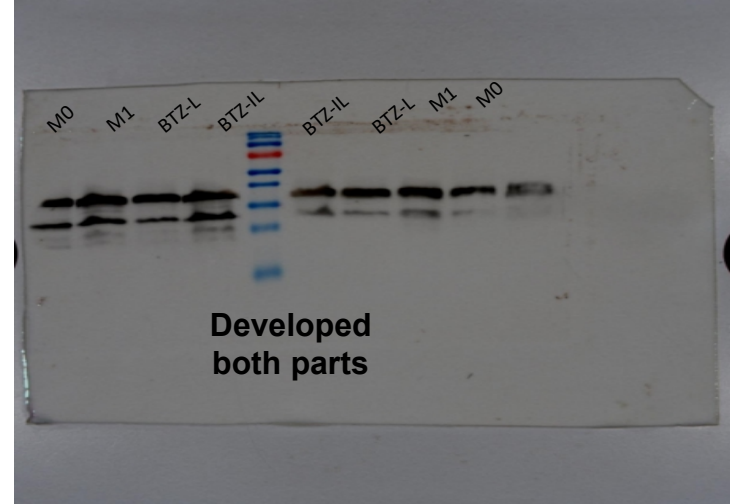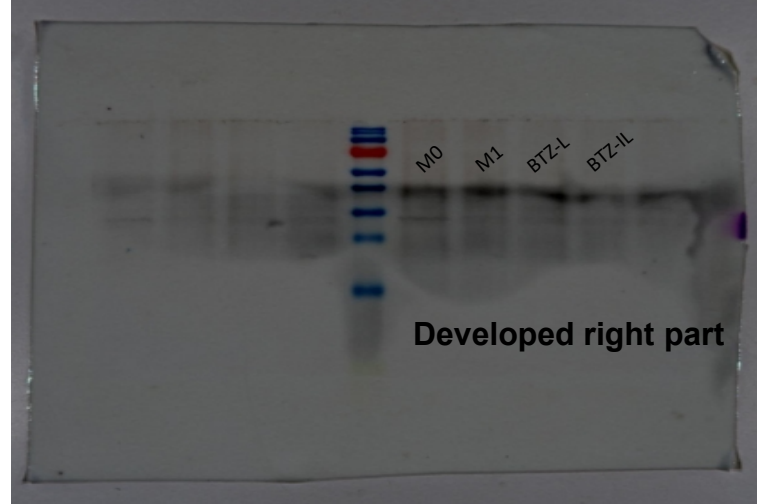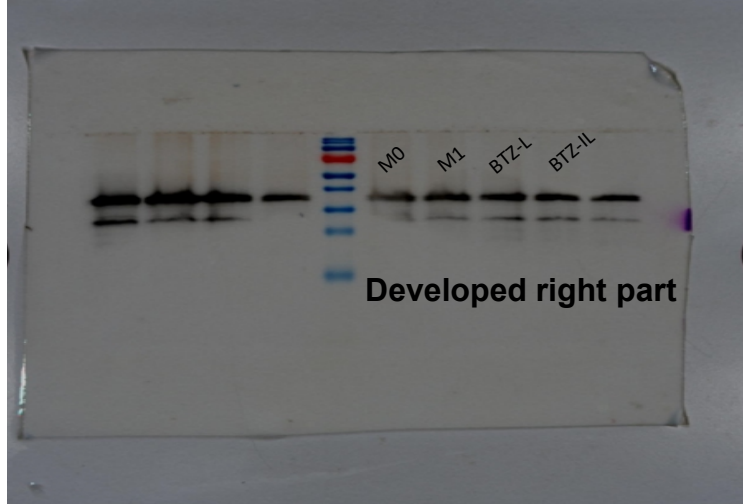

Blot:4 ERK-1 44 kDa ERK-2 42 kDa

Present in manuscript

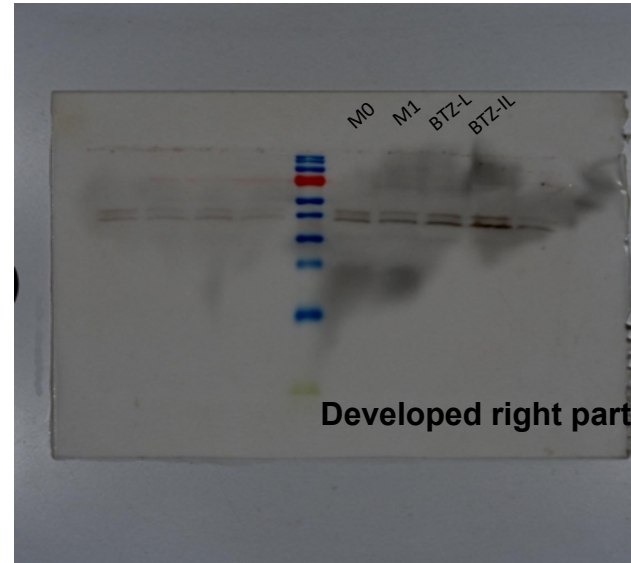

Blot:4 ERK-1 44 kDa ERK-2 42 kDa

Biological Replicate

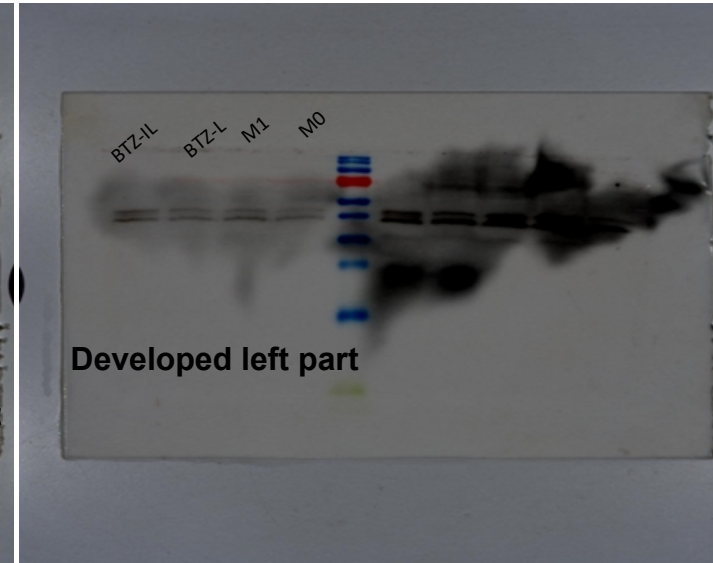

Blot:4 GAPDH 37 kDa (after stripping)

Present in manuscript

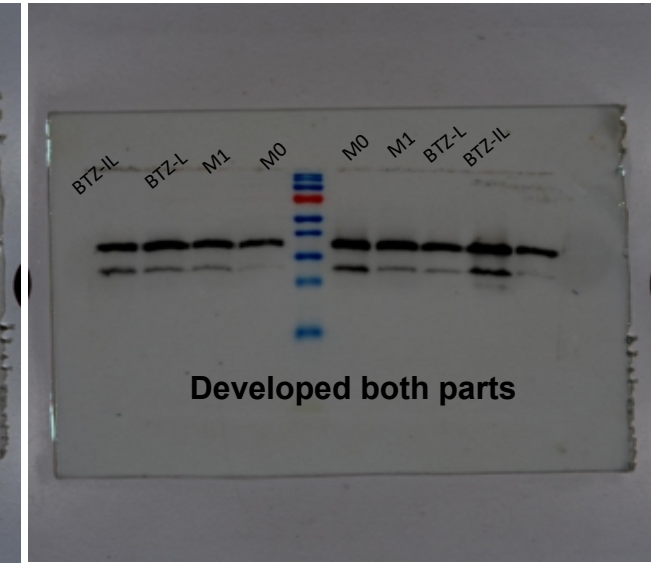

Blot:4 BAX 23 kDa

(after stripping a second time)

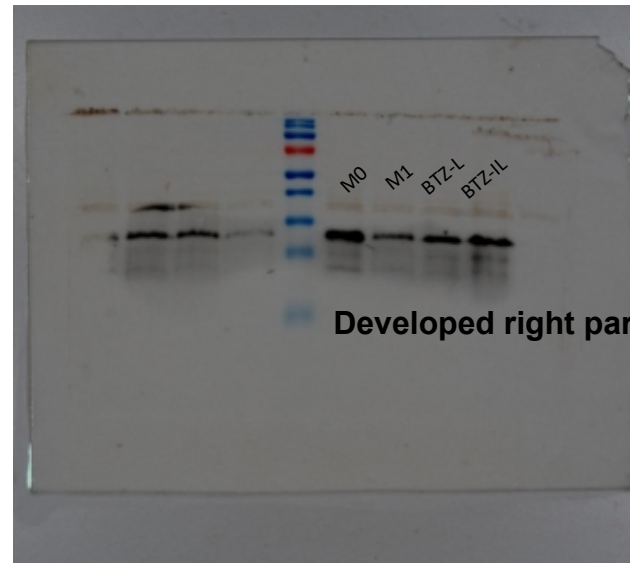

Blot:5 BAX 23 kDa

Present in manuscript

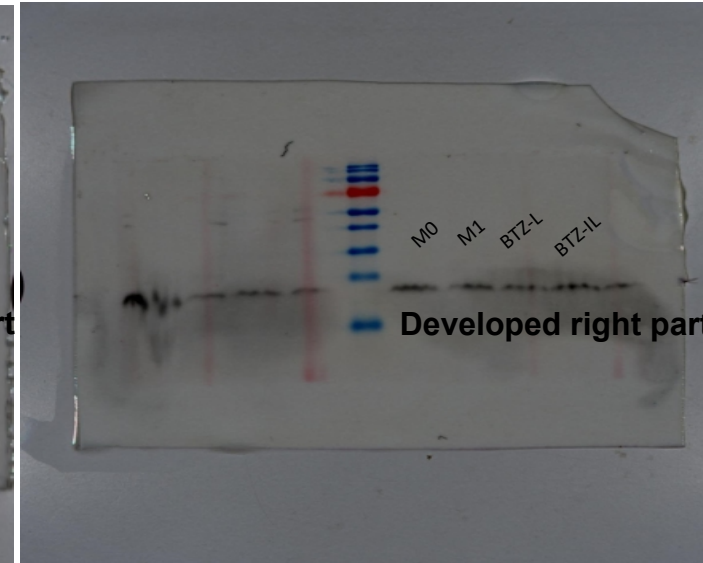

Blot:5 GAPDH 37 kDa

(after stripping)

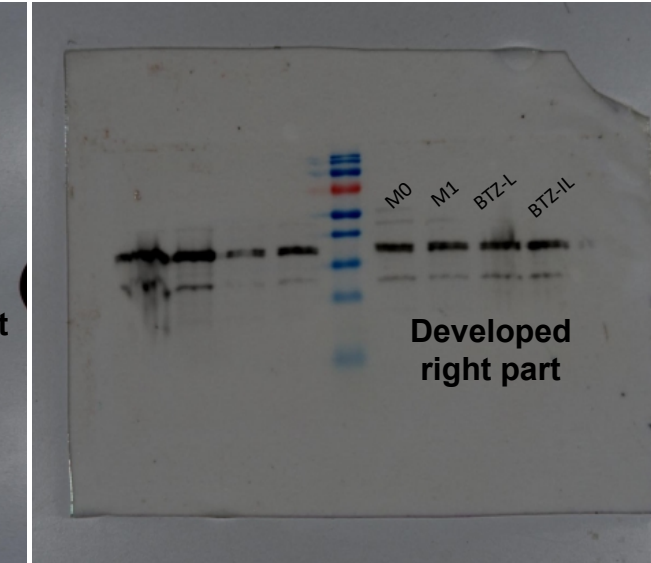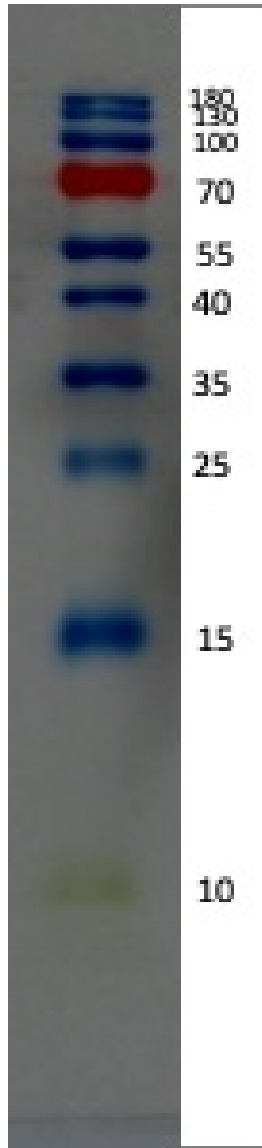

**Blot:6 Caspase-3 32kDa**  
**Present in manuscript**

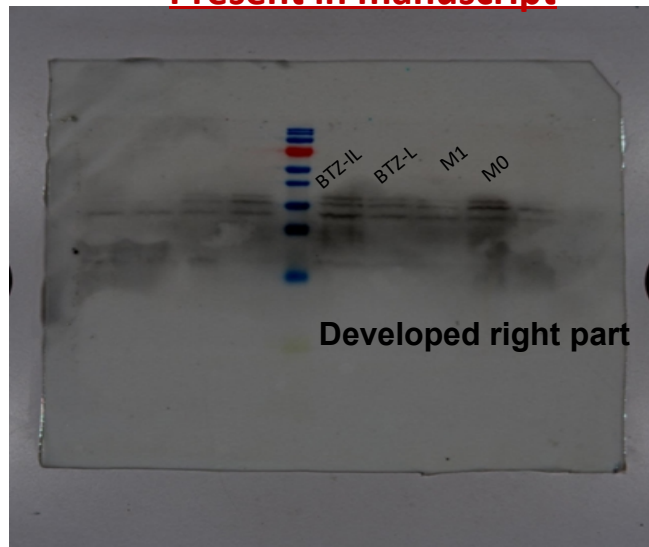

**Blot:6 GAPDH 37kDa (after stripping)**

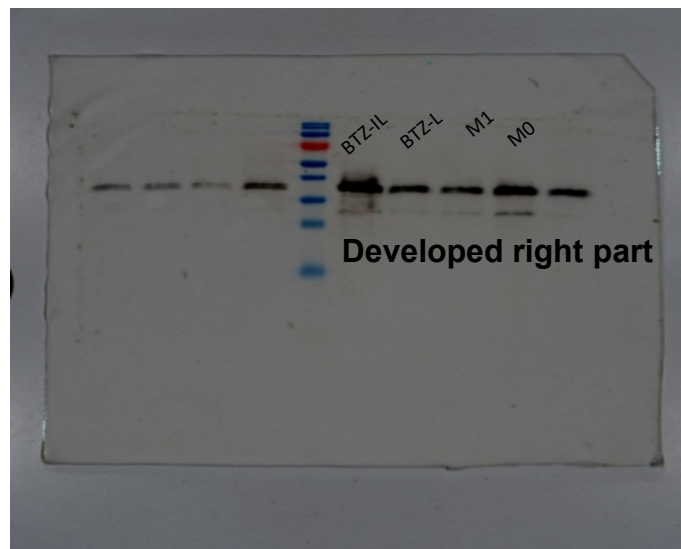

**Blot:6 Caspase-9 47kDa (after stripping again)**

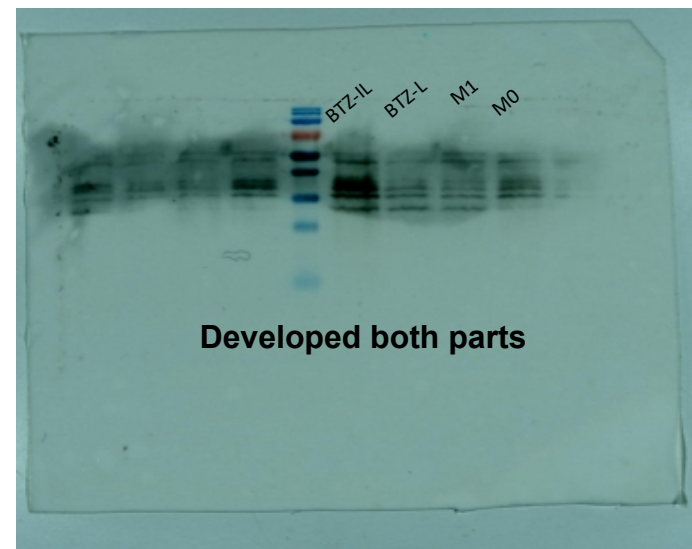

**Blot:7 Caspase-9 47kDa**  
**Present in manuscript**

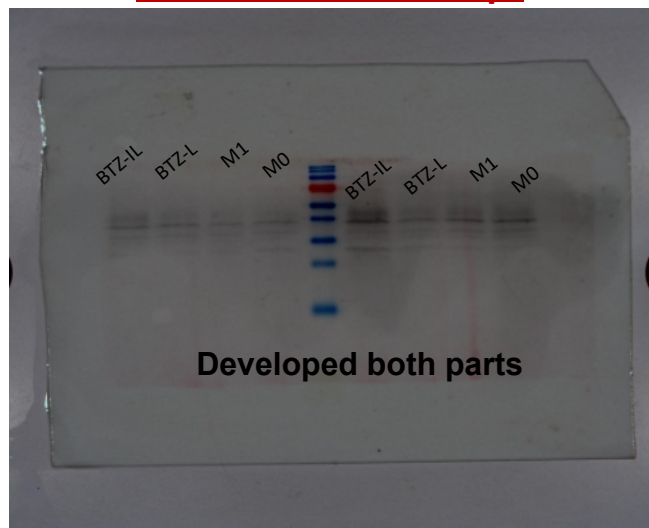

**Blot:7 GAPDH 37kDa (after stripping)**

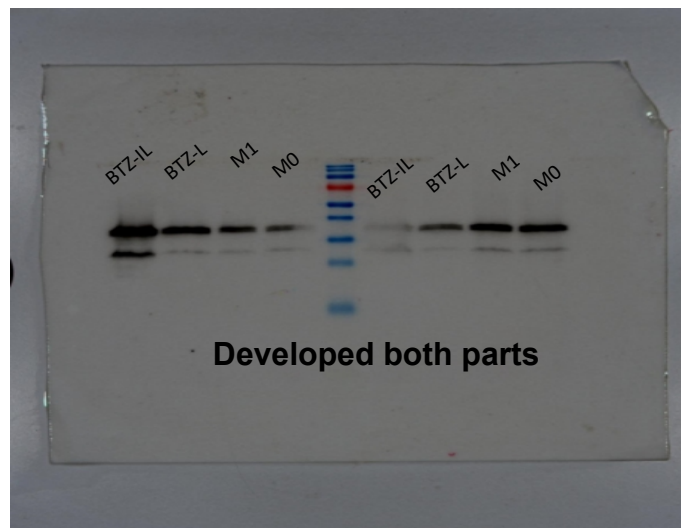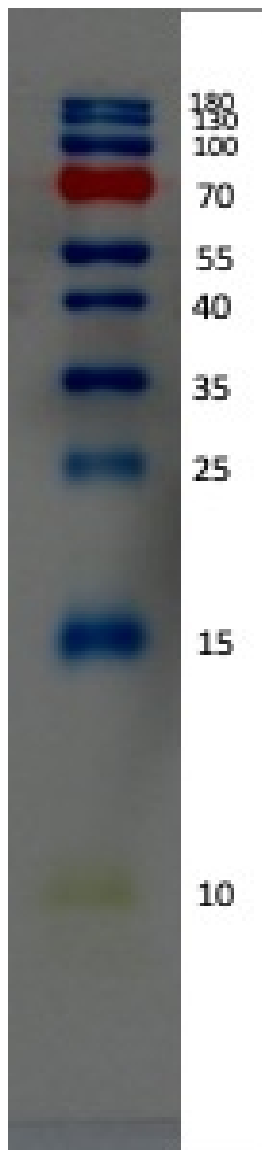

Supplement: d4nr00137k2.pdf [file d4nr00137k2.pdf]
